# Supplementary material for: Using deep learning to identify recent positive selection in malaria parasite sequence data
Source: Springer Nature journal article supplement (doi:10.1186/s12936-021-03788-x), 2021-06-14

## S1 Table

### Simulation parameters for the data generation using SFS\_Code software

| Scenario                            | No. of Simulated datasets* | Selection Coefficient | Time window*** |
|-------------------------------------|----------------------------|-----------------------|----------------|
| Stronger selection – recent sweep   | 80                         | 2000                  | 0.20           |
| Stronger selection – historic sweep | 80                         | 2000                  | 0.40           |
| Weaker selection – recent sweep     | 80                         | 400                   | 0.20           |
| Partial sweep**                     | 80                         | 100                   | 0.15           |
| Neutral                             | 80 x 4                     | 0                     | 0.20           |

\* Each simulated dataset consisted of 4 populations of 100 individual parasites (50% sweep; 50% neutral), and a locus length of 1kbp, with the mutation inserted at position 500. The mutation rate per site was set to 0.01 and the recombination rate per site was 0.02; \*\* The partial sweeps were created with rejection sampling, where only sweeps that had a derived allele frequency of between 33% and 80% were kept; \*\*\* The window is the time between the introduction of the mutation and sampling expressed in  $2N$  generations, with  $N$  being the population size.

## S2 Table

### Performance of Convolutional Neural Network (CNN) model structures on simulated datasets

| Model | Description of model and changes*                                                                                                                                      | Trainable parameters | Validation Loss** | Validation Accuracy (%) |
|-------|------------------------------------------------------------------------------------------------------------------------------------------------------------------------|----------------------|-------------------|-------------------------|
| 1     | Model used in our study (one convolutional layer with 4 filters, with respective filter size of (40,9) followed by two drop-out and dense layers with ReLu activation) | 4,525                | 0.33              | 93.8                    |
| 2     | Two convolutional layers with 4 filters in each layer, with respective kernel size of 11 and 5                                                                         | 78,277               | 0.42              | 75.0                    |
| 3     | Three convolutional layers with 4 filters in each layer, with respective kernel sizes of 11, 5 and 3                                                                   | 71,705               | 0.49              | 62.5                    |
| 4     | Increase of number of convolutional filters to 8                                                                                                                       | 15,193               | 0.26              | 87.5                    |
| 5     | Decrease of number of convolutional filters to 2                                                                                                                       | 1,495                | 0.59              | 68.8                    |
| 6     | Increase of drop-out rate to 0.4 (from 0.2)                                                                                                                            | 4,525                | 0.32              | 87.5                    |
| 7     | Decrease of drop-out rate to 0.1 (from 0.2)                                                                                                                            | 4,525                | 0.48              | 75.0                    |

\* Model 1 is the final model used across our datasets, and Models 2 - 7 are deviations from this; ReLu: Rectified Linear Unit. \*\* Validation loss as measured by binary cross-entropy. The performance (validation loss, validation accuracy) was measured by training on 64 simulated isolates with the same characteristics as other simulations (e.g. undergoing different forms of sweeps as well as neutral evolution) with all performance metrics measured on a validation set of 16 isolates.

### S3 Table

#### Sample origin by geographic location

| Country          | <i>P. falciparum</i> |      | <i>P. vivax</i> |      |
|------------------|----------------------|------|-----------------|------|
|                  | N*                   | %    | N**             | %    |
| Cambodia         | 351                  | 31.2 | 32              | 8.7  |
| Malawi           | 221                  | 19.6 | -               |      |
| Ghana            | 202                  | 18.0 | -               |      |
| Vietnam          | 187                  | 16.6 | -               |      |
| Thailand         | 164                  | 14.6 | 128             | 34.8 |
| Peru             | -                    | -    | 58              | 15.8 |
| Malaysia         | -                    | -    | 50              | 13.6 |
| Colombia         | -                    | -    | 30              | 8.2  |
| Papua New Guinea | -                    | -    | 26              | 7.1  |
| Mexico           | -                    | -    | 20              | 5.4  |
| Ethiopia         | -                    | -    | 24              | 6.5  |
| Total            | 1,125                | 100  | 368             | 100  |

\* see **S4 Table** for a list of sequence data accession numbers

\*\* see **S5 Table** for a list of sequence data accession numbers

**S4 Table. The 1,125 high-quality *Plasmodium falciparum* isolates used in this study**

| Country  | Identifier | Country  | Identifier | Country  | Identifier | Country  | Identifier |
|----------|------------|----------|------------|----------|------------|----------|------------|
| Cambodia | ERS009721  | Cambodia | ERS014167  | Cambodia | ERS028699  | Cambodia | ERS032695  |
| Cambodia | ERS010057  | Cambodia | ERS014168  | Cambodia | ERS028700  | Cambodia | ERS032696  |
| Cambodia | ERS010059  | Cambodia | ERS014169  | Cambodia | ERS028701  | Cambodia | ERS032697  |
| Cambodia | ERS010062  | Cambodia | ERS014170  | Cambodia | ERS028702  | Cambodia | ERS045932  |
| Cambodia | ERS010066  | Cambodia | ERS014171  | Cambodia | ERS028703  | Cambodia | ERS045933  |
| Cambodia | ERS010067  | Cambodia | ERS014172  | Cambodia | ERS028704  | Cambodia | ERS045934  |
| Cambodia | ERS010216  | Cambodia | ERS014173  | Cambodia | ERS028705  | Cambodia | ERS045935  |
| Cambodia | ERS010217  | Cambodia | ERS017698  | Cambodia | ERS028706  | Cambodia | ERS045936  |
| Cambodia | ERS010318  | Cambodia | ERS017699  | Cambodia | ERS028707  | Cambodia | ERS045937  |
| Cambodia | ERS010319  | Cambodia | ERS017700  | Cambodia | ERS028708  | Cambodia | ERS045938  |
| Cambodia | ERS010320  | Cambodia | ERS017702  | Cambodia | ERS028709  | Cambodia | ERS045939  |
| Cambodia | ERS010321  | Cambodia | ERS017705  | Cambodia | ERS028710  | Cambodia | ERS050859  |
| Cambodia | ERS010322  | Cambodia | ERS017706  | Cambodia | ERS028712  | Cambodia | ERS050860  |
| Cambodia | ERS010323  | Cambodia | ERS017707  | Cambodia | ERS028713  | Cambodia | ERS050865  |
| Cambodia | ERS010324  | Cambodia | ERS023736  | Cambodia | ERS028714  | Cambodia | ERS050866  |
| Cambodia | ERS010325  | Cambodia | ERS023737  | Cambodia | ERS028715  | Cambodia | ERS050870  |
| Cambodia | ERS010327  | Cambodia | ERS023738  | Cambodia | ERS028716  | Cambodia | ERS050872  |
| Cambodia | ERS010330  | Cambodia | ERS023739  | Cambodia | ERS028717  | Cambodia | ERS050885  |
| Cambodia | ERS010331  | Cambodia | ERS023740  | Cambodia | ERS028718  | Cambodia | ERS050890  |
| Cambodia | ERS010332  | Cambodia | ERS023741  | Cambodia | ERS028719  | Cambodia | ERS052777  |
| Cambodia | ERS010333  | Cambodia | ERS023742  | Cambodia | ERS028720  | Cambodia | ERS052778  |
| Cambodia | ERS010334  | Cambodia | ERS023743  | Cambodia | ERS028721  | Cambodia | ERS052781  |
| Cambodia | ERS010335  | Cambodia | ERS023744  | Cambodia | ERS028722  | Cambodia | ERS052784  |
| Cambodia | ERS010336  | Cambodia | ERS023745  | Cambodia | ERS028723  | Cambodia | ERS052785  |
| Cambodia | ERS010337  | Cambodia | ERS023746  | Cambodia | ERS028724  | Cambodia | ERS052790  |
| Cambodia | ERS010346  | Cambodia | ERS023747  | Cambodia | ERS028725  | Cambodia | ERS071770  |
| Cambodia | ERS010511  | Cambodia | ERS023748  | Cambodia | ERS032018  | Cambodia | ERS071771  |
| Cambodia | ERS010516  | Cambodia | ERS023749  | Cambodia | ERS032022  | Cambodia | ERS071773  |
| Cambodia | ERS010590  | Cambodia | ERS023750  | Cambodia | ERS032026  | Cambodia | ERS071774  |
| Cambodia | ERS010592  | Cambodia | ERS024123  | Cambodia | ERS032029  | Cambodia | ERS071776  |
| Cambodia | ERS010598  | Cambodia | ERS025100  | Cambodia | ERS032037  | Cambodia | ERS071777  |
| Cambodia | ERS010669  | Cambodia | ERS025257  | Cambodia | ERS032050  | Cambodia | ERS071778  |
| Cambodia | ERS010672  | Cambodia | ERS025258  | Cambodia | ERS032060  | Cambodia | ERS071779  |
| Cambodia | ERS010673  | Cambodia | ERS025259  | Cambodia | ERS032109  | Cambodia | ERS071781  |
| Cambodia | ERS010779  | Cambodia | ERS025262  | Cambodia | ERS032135  | Cambodia | ERS071782  |
| Cambodia | ERS010786  | Cambodia | ERS025263  | Cambodia | ERS032243  | Cambodia | ERS071784  |
| Cambodia | ERS013843  | Cambodia | ERS025265  | Cambodia | ERS032246  | Cambodia | ERS071787  |
| Cambodia | ERS013844  | Cambodia | ERS025266  | Cambodia | ERS032249  | Cambodia | ERS071791  |
| Cambodia | ERS014154  | Cambodia | ERS025267  | Cambodia | ERS032255  | Cambodia | ERS071794  |
| Cambodia | ERS014155  | Cambodia | ERS025268  | Cambodia | ERS032258  | Cambodia | ERS071796  |
| Cambodia | ERS014156  | Cambodia | ERS025269  | Cambodia | ERS032683  | Cambodia | ERS071797  |
| Cambodia | ERS014157  | Cambodia | ERS025271  | Cambodia | ERS032686  | Cambodia | ERS071799  |
| Cambodia | ERS014158  | Cambodia | ERS025272  | Cambodia | ERS032687  | Cambodia | ERS071800  |
| Cambodia | ERS014159  | Cambodia | ERS025273  | Cambodia | ERS032688  | Cambodia | ERS071809  |
| Cambodia | ERS014161  | Cambodia | ERS025274  | Cambodia | ERS032689  | Cambodia | ERS071812  |
| Cambodia | ERS014162  | Cambodia | ERS025275  | Cambodia | ERS032690  | Cambodia | ERS071815  |
| Cambodia | ERS014163  | Cambodia | ERS025276  | Cambodia | ERS032691  | Cambodia | ERS071824  |
| Cambodia | ERS014164  | Cambodia | ERS028696  | Cambodia | ERS032692  | Cambodia | ERS088705  |

|          |           |          |           |          |           |          |           |
|----------|-----------|----------|-----------|----------|-----------|----------|-----------|
| Cambodia | ERS014165 | Cambodia | ERS028697 | Cambodia | ERS032693 | Cambodia | ERS088706 |
| Cambodia | ERS014166 | Cambodia | ERS028698 | Cambodia | ERS032694 | Cambodia | ERS140927 |
| Cambodia | ERS140928 | Cambodia | ERS174484 | Cambodia | ERS010778 | Ghana    | ERS009734 |
| Cambodia | ERS140935 | Cambodia | ERS174485 | Cambodia | ERS010782 | Ghana    | ERS010081 |
| Cambodia | ERS140936 | Cambodia | ERS174486 | Cambodia | ERS010788 | Ghana    | ERS010083 |
| Cambodia | ERS141406 | Cambodia | ERS174488 | Cambodia | ERS017561 | Ghana    | ERS010084 |
| Cambodia | ERS141408 | Cambodia | ERS174489 | Cambodia | ERS024125 | Ghana    | ERS010085 |
| Cambodia | ERS141414 | Cambodia | ERS174492 | Cambodia | ERS024126 | Ghana    | ERS010086 |
| Cambodia | ERS141415 | Cambodia | ERS174511 | Cambodia | ERS024127 | Ghana    | ERS010087 |
| Cambodia | ERS141417 | Cambodia | ERS174512 | Cambodia | ERS024128 | Ghana    | ERS010088 |
| Cambodia | ERS141474 | Cambodia | ERS174567 | Cambodia | ERS024129 | Ghana    | ERS010089 |
| Cambodia | ERS141480 | Cambodia | ERS174569 | Cambodia | ERS024130 | Ghana    | ERS010090 |
| Cambodia | ERS141501 | Cambodia | ERS174570 | Cambodia | ERS024133 | Ghana    | ERS010124 |
| Cambodia | ERS141502 | Cambodia | ERS174571 | Cambodia | ERS024135 | Ghana    | ERS010125 |
| Cambodia | ERS142851 | Cambodia | ERS174572 | Cambodia | ERS024136 | Ghana    | ERS011021 |
| Cambodia | ERS143415 | Cambodia | ERS174573 | Cambodia | ERS031999 | Ghana    | ERS011022 |
| Cambodia | ERS143416 | Cambodia | ERS174574 | Cambodia | ERS032058 | Ghana    | ERS011023 |
| Cambodia | ERS143417 | Cambodia | ERS174575 | Cambodia | ERS032071 | Ghana    | ERS011025 |
| Cambodia | ERS143418 | Cambodia | ERS174576 | Cambodia | ERS032077 | Ghana    | ERS011026 |
| Cambodia | ERS143420 | Cambodia | ERS174577 | Cambodia | ERS032082 | Ghana    | ERS011027 |
| Cambodia | ERS143423 | Cambodia | ERS174578 | Cambodia | ERS032091 | Ghana    | ERS013064 |
| Cambodia | ERS143425 | Cambodia | ERS174580 | Cambodia | ERS032093 | Ghana    | ERS013065 |
| Cambodia | ERS143430 | Cambodia | ERS175810 | Cambodia | ERS032136 | Ghana    | ERS013066 |
| Cambodia | ERS143432 | Cambodia | ERS193641 | Cambodia | ERS032637 | Ghana    | ERS013067 |
| Cambodia | ERS143434 | Cambodia | ERS199592 | Cambodia | ERS010789 | Ghana    | ERS013068 |
| Cambodia | ERS143436 | Cambodia | ERS199597 | Cambodia | ERS010790 | Ghana    | ERS013069 |
| Cambodia | ERS143443 | Cambodia | ERS199602 | Cambodia | ERS024137 | Ghana    | ERS013071 |
| Cambodia | ERS143444 | Cambodia | ERS199607 | Cambodia | ERS024139 | Ghana    | ERS013072 |
| Cambodia | ERS143446 | Cambodia | ERS199612 | Cambodia | ERS024140 | Ghana    | ERS013073 |
| Cambodia | ERS143447 | Cambodia | ERS199617 | Cambodia | ERS024142 | Ghana    | ERS013074 |
| Cambodia | ERS143452 | Cambodia | ERS199622 | Cambodia | ERS024143 | Ghana    | ERS013075 |
| Cambodia | ERS143453 | Cambodia | ERS199627 | Cambodia | ERS024144 | Ghana    | ERS013076 |
| Cambodia | ERS143456 | Cambodia | ERS199632 | Cambodia | ERS024145 | Ghana    | ERS013077 |
| Cambodia | ERS143457 | Cambodia | ERS199637 | Cambodia | ERS024146 | Ghana    | ERS013078 |
| Cambodia | ERS143459 | Cambodia | ERS224869 | Cambodia | ERS024147 | Ghana    | ERS013079 |
| Cambodia | ERS143461 | Cambodia | ERS224889 | Cambodia | ERS024148 | Ghana    | ERS013080 |
| Cambodia | ERS143468 | Cambodia | ERS224899 | Cambodia | ERS024149 | Ghana    | ERS013081 |
| Cambodia | ERS143470 | Cambodia | ERS224904 | Cambodia | ERS024150 | Ghana    | ERS013082 |
| Cambodia | ERS143483 | Cambodia | ERS224909 | Cambodia | ERS024151 | Ghana    | ERS013091 |
| Cambodia | ERS143486 | Cambodia | ERS224914 | Cambodia | ERS024152 | Ghana    | ERS013092 |
| Cambodia | ERS143490 | Cambodia | ERS336365 | Cambodia | ERS032003 | Ghana    | ERS013093 |
| Cambodia | ERS143491 | Cambodia | ERS336376 | Cambodia | ERS032017 | Ghana    | ERS013094 |
| Cambodia | ERS143492 | Cambodia | ERS024141 | Cambodia | ERS032031 | Ghana    | ERS013095 |
| Cambodia | ERS143500 | Cambodia | ERS032014 | Cambodia | ERS032039 | Ghana    | ERS013096 |
| Cambodia | ERS143504 | Cambodia | ERS009740 | Cambodia | ERS032056 | Ghana    | ERS013097 |
| Cambodia | ERS143512 | Cambodia | ERS009744 | Cambodia | ERS032106 | Ghana    | ERS013098 |
| Cambodia | ERS143515 | Cambodia | ERS009745 | Cambodia | ERS032108 | Ghana    | ERS013099 |
| Cambodia | ERS164616 | Cambodia | ERS010054 | Cambodia | ERS032638 | Ghana    | ERS013100 |
| Cambodia | ERS164617 | Cambodia | ERS010155 | Cambodia | ERS157463 | Ghana    | ERS013101 |
| Cambodia | ERS164619 | Cambodia | ERS010156 | Ghana    | ERS009723 | Ghana    | ERS017384 |

|          |           |          |           |        |           |        |           |
|----------|-----------|----------|-----------|--------|-----------|--------|-----------|
| Cambodia | ERS164622 | Cambodia | ERS010670 | Ghana  | ERS009725 | Ghana  | ERS017385 |
| Cambodia | ERS164623 | Cambodia | ERS010671 | Ghana  | ERS009727 | Ghana  | ERS017386 |
| Cambodia | ERS164624 | Cambodia | ERS010776 | Ghana  | ERS009728 | Ghana  | ERS017387 |
| Cambodia | ERS174483 | Cambodia | ERS010777 | Ghana  | ERS009730 | Ghana  | ERS017388 |
| Ghana    | ERS017389 | Ghana    | ERS022963 | Ghana  | ERS032185 | Malawi | ERS032653 |
| Ghana    | ERS017390 | Ghana    | ERS022964 | Ghana  | ERS032188 | Malawi | ERS032654 |
| Ghana    | ERS017391 | Ghana    | ERS022965 | Ghana  | ERS032189 | Malawi | ERS032657 |
| Ghana    | ERS017392 | Ghana    | ERS022966 | Ghana  | ERS032190 | Malawi | ERS040098 |
| Ghana    | ERS017393 | Ghana    | ERS022967 | Ghana  | ERS032191 | Malawi | ERS040099 |
| Ghana    | ERS017394 | Ghana    | ERS022968 | Ghana  | ERS032192 | Malawi | ERS040100 |
| Ghana    | ERS017395 | Ghana    | ERS022969 | Ghana  | ERS032195 | Malawi | ERS040101 |
| Ghana    | ERS017396 | Ghana    | ERS022970 | Ghana  | ERS032196 | Malawi | ERS040103 |
| Ghana    | ERS017397 | Ghana    | ERS022971 | Ghana  | ERS032199 | Malawi | ERS053866 |
| Ghana    | ERS017398 | Ghana    | ERS022972 | Ghana  | ERS032201 | Malawi | ERS053871 |
| Ghana    | ERS017399 | Ghana    | ERS022973 | Ghana  | ERS032202 | Malawi | ERS053875 |
| Ghana    | ERS017400 | Ghana    | ERS022974 | Ghana  | ERS032204 | Malawi | ERS053876 |
| Ghana    | ERS017401 | Ghana    | ERS022975 | Ghana  | ERS032205 | Malawi | ERS053877 |
| Ghana    | ERS017402 | Ghana    | ERS022976 | Ghana  | ERS032212 | Malawi | ERS053938 |
| Ghana    | ERS022744 | Ghana    | ERS022977 | Ghana  | ERS032213 | Malawi | ERS053940 |
| Ghana    | ERS022745 | Ghana    | ERS022978 | Ghana  | ERS032215 | Malawi | ERS053942 |
| Ghana    | ERS022746 | Ghana    | ERS022979 | Ghana  | ERS032218 | Malawi | ERS053944 |
| Ghana    | ERS022747 | Ghana    | ERS022981 | Ghana  | ERS032219 | Malawi | ERS053945 |
| Ghana    | ERS022748 | Ghana    | ERS022982 | Ghana  | ERS032220 | Malawi | ERS053947 |
| Ghana    | ERS022749 | Ghana    | ERS022984 | Ghana  | ERS032221 | Malawi | ERS053948 |
| Ghana    | ERS022750 | Ghana    | ERS022986 | Ghana  | ERS032222 | Malawi | ERS053949 |
| Ghana    | ERS022751 | Ghana    | ERS031998 | Ghana  | ERS032223 | Malawi | ERS053950 |
| Ghana    | ERS022754 | Ghana    | ERS032001 | Ghana  | ERS032226 | Malawi | ERS053952 |
| Ghana    | ERS022755 | Ghana    | ERS032002 | Ghana  | ERS032227 | Malawi | ERS053953 |
| Ghana    | ERS022756 | Ghana    | ERS032007 | Ghana  | ERS032229 | Malawi | ERS053954 |
| Ghana    | ERS022757 | Ghana    | ERS032011 | Ghana  | ERS032230 | Malawi | ERS053955 |
| Ghana    | ERS022758 | Ghana    | ERS032012 | Ghana  | ERS032231 | Malawi | ERS053956 |
| Ghana    | ERS022760 | Ghana    | ERS032028 | Ghana  | ERS032232 | Malawi | ERS053957 |
| Ghana    | ERS022761 | Ghana    | ERS032030 | Ghana  | ERS032233 | Malawi | ERS053958 |
| Ghana    | ERS022762 | Ghana    | ERS032032 | Ghana  | ERS032236 | Malawi | ERS053960 |
| Ghana    | ERS022764 | Ghana    | ERS032033 | Ghana  | ERS032238 | Malawi | ERS053878 |
| Ghana    | ERS022765 | Ghana    | ERS032034 | Ghana  | ERS032239 | Malawi | ERS053880 |
| Ghana    | ERS022768 | Ghana    | ERS032035 | Ghana  | ERS032667 | Malawi | ERS053890 |
| Ghana    | ERS022770 | Ghana    | ERS032038 | Ghana  | ERS032668 | Malawi | ERS053891 |
| Ghana    | ERS022771 | Ghana    | ERS032044 | Ghana  | ERS032669 | Malawi | ERS053895 |
| Ghana    | ERS022773 | Ghana    | ERS032047 | Ghana  | ERS032670 | Malawi | ERS053897 |
| Ghana    | ERS022774 | Ghana    | ERS032053 | Ghana  | ERS032671 | Malawi | ERS055901 |
| Ghana    | ERS022942 | Ghana    | ERS032054 | Ghana  | ERS032672 | Malawi | ERS055903 |
| Ghana    | ERS022948 | Ghana    | ERS032067 | Ghana  | ERS032673 | Malawi | ERS055904 |
| Ghana    | ERS022949 | Ghana    | ERS032170 | Ghana  | ERS032674 | Malawi | ERS055905 |
| Ghana    | ERS022950 | Ghana    | ERS032171 | Ghana  | ERS032675 | Malawi | ERS055906 |
| Ghana    | ERS022952 | Ghana    | ERS032172 | Malawi | ERS032647 | Malawi | ERS055907 |
| Ghana    | ERS022953 | Ghana    | ERS032173 | Malawi | ERS032660 | Malawi | ERS055908 |
| Ghana    | ERS022954 | Ghana    | ERS032174 | Malawi | ERS032661 | Malawi | ERS055909 |
| Ghana    | ERS022955 | Ghana    | ERS032176 | Malawi | ERS032662 | Malawi | ERS055911 |
| Ghana    | ERS022956 | Ghana    | ERS032177 | Malawi | ERS032665 | Malawi | ERS055913 |

|        |           |        |           |        |           |          |           |
|--------|-----------|--------|-----------|--------|-----------|----------|-----------|
| Ghana  | ERS022957 | Ghana  | ERS032178 | Malawi | ERS032666 | Malawi   | ERS055914 |
| Ghana  | ERS022958 | Ghana  | ERS032180 | Malawi | ERS032648 | Malawi   | ERS053902 |
| Ghana  | ERS022959 | Ghana  | ERS032181 | Malawi | ERS032649 | Malawi   | ERS053903 |
| Ghana  | ERS022960 | Ghana  | ERS032182 | Malawi | ERS032650 | Malawi   | ERS053904 |
| Ghana  | ERS022961 | Ghana  | ERS032183 | Malawi | ERS032651 | Malawi   | ERS164642 |
| Ghana  | ERS022962 | Ghana  | ERS032184 | Malawi | ERS032652 | Malawi   | ERS164677 |
| Malawi | ERS164686 | Malawi | ERS168607 | Malawi | ERS188108 | Malawi   | ERS188141 |
| Malawi | ERS168594 | Malawi | ERS168608 | Malawi | ERS188115 | Malawi   | ERS188148 |
| Malawi | ERS168595 | Malawi | ERS168609 | Malawi | ERS188122 | Thailand | ERS009703 |
| Malawi | ERS168596 | Malawi | ERS168610 | Malawi | ERS188129 | Thailand | ERS009705 |
| Malawi | ERS168597 | Malawi | ERS168611 | Malawi | ERS188136 | Thailand | ERS009706 |
| Malawi | ERS168598 | Malawi | ERS168612 | Malawi | ERS188067 | Thailand | ERS009707 |
| Malawi | ERS168599 | Malawi | ERS168614 | Malawi | ERS188081 | Thailand | ERS009709 |
| Malawi | ERS168600 | Malawi | ERS168615 | Malawi | ERS188088 | Thailand | ERS009710 |
| Malawi | ERS168601 | Malawi | ERS168616 | Malawi | ERS188095 | Thailand | ERS009713 |
| Malawi | ERS168602 | Malawi | ERS168617 | Malawi | ERS188102 | Thailand | ERS009714 |
| Malawi | ERS168603 | Malawi | ERS193667 | Malawi | ERS188109 | Thailand | ERS009715 |
| Malawi | ERS168604 | Malawi | ERS193672 | Malawi | ERS188116 | Thailand | ERS009716 |
| Malawi | ERS168605 | Malawi | ERS193623 | Malawi | ERS188123 | Thailand | ERS009717 |
| Malawi | ERS168618 | Malawi | ERS193628 | Malawi | ERS188130 | Thailand | ERS009718 |
| Malawi | ERS168619 | Malawi | ERS193638 | Malawi | ERS188137 | Thailand | ERS009722 |
| Malawi | ERS168620 | Malawi | ERS193643 | Malawi | ERS188144 | Thailand | ERS009956 |
| Malawi | ERS168621 | Malawi | ERS193648 | Malawi | ERS188068 | Thailand | ERS009957 |
| Malawi | ERS168622 | Malawi | ERS193653 | Malawi | ERS188075 | Thailand | ERS009958 |
| Malawi | ERS168623 | Malawi | ERS193658 | Malawi | ERS188082 | Thailand | ERS009959 |
| Malawi | ERS168624 | Malawi | ERS193663 | Malawi | ERS188089 | Thailand | ERS009960 |
| Malawi | ERS168625 | Malawi | ERS193668 | Malawi | ERS188096 | Thailand | ERS009961 |
| Malawi | ERS168627 | Malawi | ERS193673 | Malawi | ERS188103 | Thailand | ERS009962 |
| Malawi | ERS168628 | Malawi | ERS193678 | Malawi | ERS188110 | Thailand | ERS009963 |
| Malawi | ERS168629 | Malawi | ERS193624 | Malawi | ERS188117 | Thailand | ERS009964 |
| Malawi | ERS168630 | Malawi | ERS193629 | Malawi | ERS188124 | Thailand | ERS009968 |
| Malawi | ERS168631 | Malawi | ERS193634 | Malawi | ERS188131 | Thailand | ERS009969 |
| Malawi | ERS168632 | Malawi | ERS193639 | Malawi | ERS188138 | Thailand | ERS010141 |
| Malawi | ERS168633 | Malawi | ERS193644 | Malawi | ERS188145 | Thailand | ERS010190 |
| Malawi | ERS168634 | Malawi | ERS193654 | Malawi | ERS188077 | Thailand | ERS010308 |
| Malawi | ERS168635 | Malawi | ERS193659 | Malawi | ERS188084 | Thailand | ERS010314 |
| Malawi | ERS168636 | Malawi | ERS193664 | Malawi | ERS188091 | Thailand | ERS010349 |
| Malawi | ERS168637 | Malawi | ERS193669 | Malawi | ERS188105 | Thailand | ERS010353 |
| Malawi | ERS168638 | Malawi | ERS193674 | Malawi | ERS188112 | Thailand | ERS010478 |
| Malawi | ERS168639 | Malawi | ERS193679 | Malawi | ERS188119 | Thailand | ERS010514 |
| Malawi | ERS168640 | Malawi | ERS193625 | Malawi | ERS188133 | Thailand | ERS010522 |
| Malawi | ERS168641 | Malawi | ERS193630 | Malawi | ERS188140 | Thailand | ERS010524 |
| Malawi | ERS168642 | Malawi | ERS188069 | Malawi | ERS188147 | Thailand | ERS010525 |
| Malawi | ERS168643 | Malawi | ERS188076 | Malawi | ERS188079 | Thailand | ERS010526 |
| Malawi | ERS168644 | Malawi | ERS188090 | Malawi | ERS188086 | Thailand | ERS010528 |
| Malawi | ERS168645 | Malawi | ERS188097 | Malawi | ERS188100 | Thailand | ERS010530 |
| Malawi | ERS168646 | Malawi | ERS188111 | Malawi | ERS188135 | Thailand | ERS010531 |
| Malawi | ERS168647 | Malawi | ERS188118 | Malawi | ERS188149 | Thailand | ERS010532 |
| Malawi | ERS168648 | Malawi | ERS188125 | Malawi | ERS188121 | Thailand | ERS010600 |
| Malawi | ERS168649 | Malawi | ERS188132 | Malawi | ERS188128 | Thailand | ERS010601 |

|          |           |          |           |          |           |          |           |
|----------|-----------|----------|-----------|----------|-----------|----------|-----------|
| Malawi   | ERS168650 | Malawi   | ERS188139 | Malawi   | ERS188071 | Thailand | ERS010602 |
| Malawi   | ERS168651 | Malawi   | ERS188146 | Malawi   | ERS188078 | Thailand | ERS010605 |
| Malawi   | ERS168652 | Malawi   | ERS188066 | Malawi   | ERS188085 | Thailand | ERS010606 |
| Malawi   | ERS168653 | Malawi   | ERS188073 | Malawi   | ERS188099 | Thailand | ERS010622 |
| Malawi   | ERS175807 | Malawi   | ERS188080 | Malawi   | ERS188106 | Thailand | ERS010626 |
| Malawi   | ERS175808 | Malawi   | ERS188087 | Malawi   | ERS188113 | Thailand | ERS010634 |
| Malawi   | ERS175809 | Malawi   | ERS188094 | Malawi   | ERS188127 | Thailand | ERS010648 |
| Malawi   | ERS168606 | Malawi   | ERS188101 | Malawi   | ERS188134 | Thailand | ERS010649 |
| Thailand | ERS010650 | Thailand | ERS142879 | Thailand | ERS174649 | Vietnam  | ERS143454 |
| Thailand | ERS017464 | Thailand | ERS142881 | Thailand | ERS174651 | Vietnam  | ERS143462 |
| Thailand | ERS017465 | Thailand | ERS142883 | Thailand | ERS174652 | Vietnam  | ERS143463 |
| Thailand | ERS017466 | Thailand | ERS142884 | Thailand | ERS174653 | Vietnam  | ERS143464 |
| Thailand | ERS017467 | Thailand | ERS154522 | Thailand | ERS174654 | Vietnam  | ERS143465 |
| Thailand | ERS017468 | Thailand | ERS164621 | Thailand | ERS174655 | Vietnam  | ERS143467 |
| Thailand | ERS017469 | Thailand | ERS174521 | Thailand | ERS174657 | Vietnam  | ERS143469 |
| Thailand | ERS017470 | Thailand | ERS174522 | Thailand | ERS174658 | Vietnam  | ERS143471 |
| Thailand | ERS017471 | Thailand | ERS174523 | Thailand | ERS174659 | Vietnam  | ERS143472 |
| Thailand | ERS017472 | Thailand | ERS174524 | Thailand | ERS174661 | Vietnam  | ERS143473 |
| Thailand | ERS023565 | Thailand | ERS174525 | Thailand | ERS174662 | Vietnam  | ERS143474 |
| Thailand | ERS023566 | Thailand | ERS174526 | Thailand | ERS174663 | Vietnam  | ERS143475 |
| Thailand | ERS023568 | Thailand | ERS174527 | Thailand | ERS174664 | Vietnam  | ERS143476 |
| Thailand | ERS023569 | Thailand | ERS174528 | Thailand | ERS174665 | Vietnam  | ERS143477 |
| Thailand | ERS023570 | Thailand | ERS174529 | Thailand | ERS174666 | Vietnam  | ERS143481 |
| Thailand | ERS023572 | Thailand | ERS174530 | Thailand | ERS174667 | Vietnam  | ERS143484 |
| Thailand | ERS023575 | Thailand | ERS174531 | Thailand | ERS174668 | Vietnam  | ERS143485 |
| Thailand | ERS023576 | Thailand | ERS174532 | Thailand | ERS174669 | Vietnam  | ERS143493 |
| Thailand | ERS142818 | Thailand | ERS174533 | Thailand | ERS347448 | Vietnam  | ERS143494 |
| Thailand | ERS142819 | Thailand | ERS174534 | Thailand | ERS347472 | Vietnam  | ERS143495 |
| Thailand | ERS142821 | Thailand | ERS174535 | Thailand | ERS347504 | Vietnam  | ERS143496 |
| Thailand | ERS142822 | Thailand | ERS174536 | Thailand | ERS347512 | Vietnam  | ERS143497 |
| Thailand | ERS142824 | Thailand | ERS174537 | Thailand | ERS010783 | Vietnam  | ERS143498 |
| Thailand | ERS142825 | Thailand | ERS174538 | Thailand | ERS010784 | Vietnam  | ERS143499 |
| Thailand | ERS142827 | Thailand | ERS174539 | Vietnam  | ERS010034 | Vietnam  | ERS143501 |
| Thailand | ERS142830 | Thailand | ERS174540 | Vietnam  | ERS010035 | Vietnam  | ERS143502 |
| Thailand | ERS142831 | Thailand | ERS174541 | Vietnam  | ERS010036 | Vietnam  | ERS143505 |
| Thailand | ERS142833 | Thailand | ERS174631 | Vietnam  | ERS013083 | Vietnam  | ERS143506 |
| Thailand | ERS142834 | Thailand | ERS174632 | Vietnam  | ERS013084 | Vietnam  | ERS143508 |
| Thailand | ERS142836 | Thailand | ERS174633 | Vietnam  | ERS013085 | Vietnam  | ERS143509 |
| Thailand | ERS142842 | Thailand | ERS174634 | Vietnam  | ERS013086 | Vietnam  | ERS143511 |
| Thailand | ERS142843 | Thailand | ERS174635 | Vietnam  | ERS013087 | Vietnam  | ERS143514 |
| Thailand | ERS142845 | Thailand | ERS174636 | Vietnam  | ERS013088 | Vietnam  | ERS143516 |
| Thailand | ERS142848 | Thailand | ERS174637 | Vietnam  | ERS013089 | Vietnam  | ERS143518 |
| Thailand | ERS142849 | Thailand | ERS174638 | Vietnam  | ERS013102 | Vietnam  | ERS143519 |
| Thailand | ERS142854 | Thailand | ERS174639 | Vietnam  | ERS013103 | Vietnam  | ERS143520 |
| Thailand | ERS142855 | Thailand | ERS174640 | Vietnam  | ERS086846 | Vietnam  | ERS154466 |
| Thailand | ERS142857 | Thailand | ERS174641 | Vietnam  | ERS142875 | Vietnam  | ERS154483 |
| Thailand | ERS142858 | Thailand | ERS174642 | Vietnam  | ERS143419 | Vietnam  | ERS174506 |
| Thailand | ERS142861 | Thailand | ERS174643 | Vietnam  | ERS143421 | Vietnam  | ERS174542 |
| Thailand | ERS142863 | Thailand | ERS174644 | Vietnam  | ERS143424 | Vietnam  | ERS174543 |
| Thailand | ERS142867 | Thailand | ERS174645 | Vietnam  | ERS143428 | Vietnam  | ERS174544 |



|          |           |          |           |         |           |         |           |
|----------|-----------|----------|-----------|---------|-----------|---------|-----------|
| Thailand | ERS142869 | Thailand | ERS174646 | Vietnam | ERS143429 | Vietnam | ERS174545 |
| Thailand | ERS142872 | Thailand | ERS174647 | Vietnam | ERS143433 | Vietnam | ERS174546 |
| Thailand | ERS142878 | Thailand | ERS174648 | Vietnam | ERS143437 | Vietnam | ERS174547 |
| Vietnam  | ERS174548 | Vietnam  | ERS086810 | Vietnam | ERS088710 | Vietnam | ERS086997 |
| Vietnam  | ERS174550 | Vietnam  | ERS086811 | Vietnam | ERS088712 | Vietnam | ERS086998 |
| Vietnam  | ERS174551 | Vietnam  | ERS086812 | Vietnam | ERS088713 | Vietnam | ERS086999 |
| Vietnam  | ERS174552 | Vietnam  | ERS086814 | Vietnam | ERS086797 | Vietnam | ERS087000 |
| Vietnam  | ERS174553 | Vietnam  | ERS086815 | Vietnam | ERS086798 | Vietnam | ERS087028 |
| Vietnam  | ERS174554 | Vietnam  | ERS086816 | Vietnam | ERS086799 | Vietnam | ERS087029 |
| Vietnam  | ERS174555 | Vietnam  | ERS086817 | Vietnam | ERS086800 | Vietnam | ERS087030 |
| Vietnam  | ERS174556 | Vietnam  | ERS086819 | Vietnam | ERS086801 | Vietnam | ERS087032 |
| Vietnam  | ERS174557 | Vietnam  | ERS086820 | Vietnam | ERS086802 | Vietnam | ERS087033 |
| Vietnam  | ERS174558 | Vietnam  | ERS086821 | Vietnam | ERS086803 | Vietnam | ERS087034 |
| Vietnam  | ERS174560 | Vietnam  | ERS086822 | Vietnam | ERS086804 | Vietnam | ERS087035 |
| Vietnam  | ERS174670 | Vietnam  | ERS086823 | Vietnam | ERS086806 | Vietnam | ERS087036 |
| Vietnam  | ERS174671 | Vietnam  | ERS086824 | Vietnam | ERS086807 | Vietnam | ERS086886 |
| Vietnam  | ERS174672 | Vietnam  | ERS086825 | Vietnam | ERS086808 | Vietnam | ERS086887 |
| Vietnam  | ERS174673 | Vietnam  | ERS086827 | Vietnam | ERS086809 | Vietnam | ERS086888 |
| Vietnam  | ERS174674 | Vietnam  | ERS086828 | Vietnam | ERS347506 | Vietnam | ERS086909 |
| Vietnam  | ERS174675 | Vietnam  | ERS086833 | Vietnam | ERS347521 | Vietnam | ERS086913 |
| Vietnam  | ERS174676 | Vietnam  | ERS086834 | Vietnam | ERS347529 | Vietnam | ERS086934 |
| Vietnam  | ERS174677 | Vietnam  | ERS086836 | Vietnam | ERS347537 | Vietnam | ERS086950 |
| Vietnam  | ERS224919 | Vietnam  | ERS086837 | Vietnam | ERS085458 | Vietnam | ERS086981 |
| Vietnam  | ERS224924 | Vietnam  | ERS086839 | Vietnam | ERS085459 | Vietnam | ERS086983 |
| Vietnam  | ERS336368 | Vietnam  | ERS086840 | Vietnam | ERS085460 | Vietnam | ERS086984 |
| Vietnam  | ERS336375 | Vietnam  | ERS086847 | Vietnam | ERS085461 | Vietnam | ERS086985 |
| Vietnam  | ERS336380 | Vietnam  | ERS086848 | Vietnam | ERS085462 | Vietnam | ERS086986 |
| Vietnam  | ERS336381 | Vietnam  | ERS086864 | Vietnam | ERS085463 | Vietnam | ERS086987 |
| Vietnam  | ERS336386 | Vietnam  | ERS086865 | Vietnam | ERS085464 | Vietnam | ERS086991 |
| Vietnam  | ERS336392 | Vietnam  | ERS086872 | Vietnam | ERS085465 | Vietnam | ERS086994 |
| Vietnam  | ERS347474 | Vietnam  | ERS086873 | Vietnam | ERS085466 | Vietnam | ERS086995 |
| Vietnam  | ERS347475 | Vietnam  | ERS086874 | Vietnam | ERS085467 |         |           |
| Vietnam  | ERS347490 | Vietnam  | ERS086876 | Vietnam | ERS085468 |         |           |
| Vietnam  | ERS347499 | Vietnam  | ERS086884 | Vietnam | ERS086796 |         |           |

**S5 Table. The 368 high-quality *Plasmodium vivax* isolates used in the study**

| Country  | Identifier | Country  | Identifier | Country  | Identifier | Country | Identifier |
|----------|------------|----------|------------|----------|------------|---------|------------|
| Cambodia | ERR020103  | Colombia | SRR1568159 | Malaysia | ERR1138869 | Mexico  | SRR1568201 |
| Cambodia | ERR023039  | Colombia | SRR1568160 | Malaysia | ERR1138870 | Mexico  | SRR1568218 |
| Cambodia | ERR023040  | Colombia | SRR1568169 | Malaysia | ERR1138871 | Mexico  | SRR1568219 |
| Cambodia | ERR023041  | Colombia | SRR1568171 | Malaysia | ERR1138872 | Mexico  | SRR1568223 |
| Cambodia | ERR023042  | Colombia | SRR1568207 | Malaysia | ERR1138873 | Mexico  | SRR1568225 |
| Cambodia | ERR027119  | Colombia | SRR1568213 | Malaysia | ERR1138875 | Mexico  | SRR1568231 |
| Cambodia | ERR039234  | Colombia | SRR1568221 | Malaysia | ERR1138876 | PNG     | SRR1562605 |
| Cambodia | ERR054080  | Colombia | SRR1568227 | Malaysia | ERR1138879 | PNG     | SRR1562669 |
| Cambodia | ERR054082  | Colombia | SRR1568230 | Malaysia | ERR1138881 | PNG     | SRR1562672 |
| Cambodia | ERR111729  | Colombia | SRR1568235 | Malaysia | ERR1138882 | PNG     | SRR1562960 |
| Cambodia | ERR123849  | Colombia | SRR1568236 | Malaysia | ERR1138883 | PNG     | SRR1562963 |
| Cambodia | ERR152408  | Colombia | SRR1573226 | Malaysia | ERR1138884 | PNG     | SRR1568105 |
| Cambodia | ERR152410  | Ethiopia | ERR925441  | Malaysia | ERR1138885 | PNG     | SRR1568147 |
| Cambodia | ERR152413  | Ethiopia | ERR925440  | Malaysia | ERR1475395 | PNG     | SRR1568177 |
| Cambodia | ERR211549  | Ethiopia | ERR925439  | Malaysia | ERR1475396 | PNG     | SRR1568185 |
| Cambodia | ERR211557  | Ethiopia | ERR925438  | Malaysia | ERR1475397 | PNG     | SRR1568189 |
| Cambodia | ERR211561  | Ethiopia | ERR925437  | Malaysia | ERR1475398 | PNG     | SRR1568214 |
| Cambodia | ERR216477  | Ethiopia | ERR925436  | Malaysia | ERR1475399 | PNG     | SRR1759411 |
| Cambodia | ERR216554  | Ethiopia | ERR925435  | Malaysia | ERR1475418 | PNG     | SRR1759522 |
| Cambodia | ERR337538  | Ethiopia | ERR925434  | Malaysia | ERR1475419 | PNG     | SRR1759523 |
| Cambodia | ERR386533  | Ethiopia | ERR925433  | Malaysia | ERR1475420 | PNG     | SRR1759592 |
| Cambodia | ERR386534  | Ethiopia | ERR925431  | Malaysia | ERR1475425 | PNG     | SRR1759594 |
| Cambodia | ERR386535  | Ethiopia | ERR925430  | Malaysia | ERR1475427 | PNG     | ERR022864  |
| Cambodia | ERR386536  | Ethiopia | ERR925424  | Malaysia | ERR1475429 | PNG     | ERR175552  |
| Cambodia | ERR386537  | Ethiopia | ERR925421  | Malaysia | ERR1475430 | PNG     | ERR175555  |
| Cambodia | ERR386538  | Ethiopia | ERR925420  | Malaysia | ERR1475434 | PNG     | ERR175557  |
| Cambodia | ERR386539  | Ethiopia | ERR925417  | Malaysia | ERR1475439 | PNG     | ERR216469  |
| Cambodia | ERR386541  | Ethiopia | ERR925416  | Malaysia | ERR1475441 | PNG     | ERR216474  |
| Cambodia | ERR386542  | Ethiopia | ERR925412  | Malaysia | ERR1475451 | PNG     | ERR527450  |
| Cambodia | ERR386543  | Ethiopia | ERR925411  | Malaysia | ERR1475456 | PNG     | ERR527453  |
| Cambodia | ERR386546  | Ethiopia | ERR925410  | Malaysia | ERR1475457 | PNG     | ERR527467  |
| Cambodia | ERR388742  | Ethiopia | ERR925409  | Malaysia | ERR054089  | PNG     | ERR527468  |
| Colombia | SRR1562518 | Ethiopia | ERR775192  | Malaysia | ERR152414  | Peru    | SRR1562512 |
| Colombia | SRR1562524 | Ethiopia | ERR775191  | Malaysia | ERR152415  | Peru    | SRR1562513 |
| Colombia | SRR1562555 | Ethiopia | ERR775190  | Malaysia | ERR527337  | Peru    | SRR1562519 |
| Colombia | SRR1562818 | Ethiopia | ERR775189  | Malaysia | ERR527363  | Peru    | SRR1562521 |
| Colombia | SRR1562870 | Malaysia | ERR1106842 | Mexico   | SRR1562522 | Peru    | SRR1562525 |
| Colombia | SRR1562965 | Malaysia | ERR1106843 | Mexico   | SRR1562526 | Peru    | SRR1562534 |
| Colombia | SRR1562967 | Malaysia | ERR1106846 | Mexico   | SRR1562839 | Peru    | SRR1562535 |
| Colombia | SRR1562971 | Malaysia | ERR1138855 | Mexico   | SRR1562840 | Peru    | SRR1562538 |
| Colombia | SRR1562975 | Malaysia | ERR1138856 | Mexico   | SRR1562968 | Peru    | SRR1562567 |
| Colombia | SRR1564650 | Malaysia | ERR1138857 | Mexico   | SRR1568077 | Peru    | SRR1562606 |
| Colombia | SRR1564660 | Malaysia | ERR1138858 | Mexico   | SRR1568110 | Peru    | SRR1562614 |
| Colombia | SRR1564664 | Malaysia | ERR1138861 | Mexico   | SRR1568126 | Peru    | SRR1562615 |
| Colombia | SRR1564665 | Malaysia | ERR1138862 | Mexico   | SRR1568127 | Peru    | SRR1562624 |

|          |            |          |            |          |            |          |            |
|----------|------------|----------|------------|----------|------------|----------|------------|
| Colombia | SRR1564670 | Malaysia | ERR1138864 | Mexico   | SRR1568150 | Peru     | SRR1562851 |
| Colombia | SRR1568112 | Malaysia | ERR1138865 | Mexico   | SRR1568153 | Peru     | SRR1562871 |
| Colombia | SRR1568118 | Malaysia | ERR1138866 | Mexico   | SRR1568158 | Peru     | SRR1562931 |
| Colombia | SRR1568128 | Malaysia | ERR1138867 | Mexico   | SRR1568181 | Peru     | SRR1562958 |
| Colombia | SRR1568155 | Malaysia | ERR1138868 | Mexico   | SRR1568190 | Peru     | SRR1562972 |
| Peru     | SRR1564630 | Thailand | ERR527372  | Thailand | ERR111714  | Thailand | ERR337629  |
| Peru     | SRR1568107 | Thailand | ERR527371  | Thailand | ERR111715  | Thailand | ERR527338  |
| Peru     | SRR1568113 | Thailand | ERR527370  | Thailand | ERR111716  | Thailand | ERR527339  |
| Peru     | SRR1568117 | Thailand | ERR527369  | Thailand | ERR111717  | Thailand | ERR527340  |
| Peru     | SRR1568122 | Thailand | ERR527368  | Thailand | ERR111718  | Thailand | ERR527341  |
| Peru     | SRR1568123 | Thailand | ERR527367  | Thailand | ERR111719  | Thailand | ERR527342  |
| Peru     | SRR1568149 | Thailand | ERR527366  | Thailand | ERR111720  | Thailand | ERR527343  |
| Peru     | SRR1568157 | Thailand | ERR527365  | Thailand | ERR111721  | Thailand | ERR527344  |
| Peru     | SRR1568162 | Thailand | ERR527364  | Thailand | ERR111722  | Thailand | ERR527345  |
| Peru     | SRR1568163 | Thailand | ERR426035  | Thailand | ERR111723  | Thailand | ERR527346  |
| Peru     | SRR1568165 | Thailand | ERR426015  | Thailand | ERR111724  | Thailand | ERR527348  |
| Peru     | SRR1568166 | Thailand | ERR404246  | Thailand | ERR111725  | Thailand | ERR527350  |
| Peru     | SRR1568168 | Thailand | ERR164695  | Thailand | ERR111726  | Thailand | ERR527383  |
| Peru     | SRR1568172 | Thailand | SRR1568229 | Thailand | ERR111727  | Thailand | ERR527382  |
| Peru     | SRR1568174 | Thailand | SRR1568209 | Thailand | ERR111728  | Thailand | ERR527381  |
| Peru     | SRR1568175 | Thailand | SRR1568208 | Thailand | ERR1475350 | Thailand | ERR527380  |
| Peru     | SRR1568178 | Thailand | SRR1568205 | Thailand | ERR1475351 | Thailand | ERR527379  |
| Peru     | SRR1568179 | Thailand | SRR1568186 | Thailand | ERR1475352 | Thailand | ERR527378  |
| Peru     | SRR1568182 | Thailand | SRR1568180 | Thailand | ERR1475353 | Thailand | ERR527377  |
| Peru     | SRR1568183 | Thailand | SRR1568161 | Thailand | ERR1475354 | Thailand | ERR527376  |
| Peru     | SRR1568184 | Thailand | SRR1568154 | Thailand | ERR1475355 | Thailand | ERR527375  |
| Peru     | SRR1568187 | Thailand | SRR1568152 | Thailand | ERR337595  | Thailand | ERR527374  |
| Peru     | SRR1568191 | Thailand | SRR1568148 | Thailand | ERR337596  | Thailand | ERR527355  |
| Peru     | SRR1568195 | Thailand | SRR1568109 | Thailand | ERR337597  | Thailand | ERR527354  |
| Peru     | SRR1568196 | Thailand | SRR1568103 | Thailand | ERR337599  | Thailand | ERR527353  |
| Peru     | SRR1568198 | Thailand | SRR1562974 | Thailand | ERR337600  | Thailand | ERR527352  |
| Peru     | SRR1568199 | Thailand | SRR1562970 | Thailand | ERR337601  | Thailand | ERR527351  |
| Peru     | SRR1568202 | Thailand | SRR1562962 | Thailand | ERR337602  | Thailand | ERR111709  |
| Peru     | SRR1568203 | Thailand | SRR1562959 | Thailand | ERR337603  | Thailand | ERR111710  |
| Peru     | SRR1568206 | Thailand | SRR1562845 | Thailand | ERR337604  | Thailand | ERR111711  |
| Peru     | SRR1568210 | Thailand | SRR1562671 | Thailand | ERR337605  | Thailand | ERR111712  |
| Peru     | SRR1568211 | Thailand | SRR1562616 | Thailand | ERR337606  | Thailand | ERR111713  |
| Peru     | SRR1568216 | Thailand | SRR1562520 | Thailand | ERR337607  | Thailand | ERR337617  |
| Peru     | SRR1568232 | Thailand | ERR773748  | Thailand | ERR337608  | Thailand | ERR337618  |
| Peru     | SRR1568234 | Thailand | ERR773747  | Thailand | ERR337609  | Thailand | ERR337619  |
| Peru     | SRR1568787 | Thailand | ERR773746  | Thailand | ERR337610  | Thailand | ERR337620  |
| Peru     | SRR1759047 | Thailand | ERR773745  | Thailand | ERR337611  | Thailand | ERR337621  |
| Peru     | SRR1759122 | Thailand | ERR713941  | Thailand | ERR337612  | Thailand | ERR337622  |
| Peru     | SRR1759307 | Thailand | ERR527362  | Thailand | ERR337613  | Thailand | ERR337623  |
| Peru     | SRR1759336 | Thailand | ERR527361  | Thailand | ERR337614  | Thailand | ERR337625  |
| Thailand | ERR527385  | Thailand | ERR527358  | Thailand | ERR337615  | Thailand | ERR337626  |
| Thailand | ERR527384  | Thailand | ERR527356  | Thailand | ERR337616  | Thailand | ERR337628  |

S6 Table

*Plasmodium falciparum* loci identified by DeepSweep (DS; with >3 SNPs)

| Chr. | Location | Gene ID<br>(PF3D7_) | Gene Function                                                    | DS<br>hits | iHS<br>hits | Rsb<br>hits |
|------|----------|---------------------|------------------------------------------------------------------|------------|-------------|-------------|
| 4    | 765952   | 0417400             | conserved protein ( <i>close to pfdhfr</i> )                     | 8          |             | 37          |
| 5    | 852924   | 0520800             | conserved protein                                                | 4          |             |             |
| 5    | 921557   | 0522400             | conserved protein ( <i>close to pfmdr1</i> )                     | 13         |             | 8           |
| 5    | 951346   | 0522900             | zinc finger protein ( <i>close to pfmdr1</i> )                   | 8          |             |             |
| 6    | 496916   | 0611800             | conserved protein                                                | 6          |             |             |
| 6    | 1109895  | 0627700             | transportin                                                      | 4          |             | 3           |
| 6    | 1115827  | 0627800             | acetyl-CoA synthetase                                            | 20         | 11          | 39          |
| 6    | 1139634  | 0628100             | HECT-domain (ubiquitin-transferase)                              | 18         | 1           | 30          |
| 6    | 1163355  | 0628200             | EIF2AK (PK4)                                                     | 5          |             | 2           |
| 6    | 1292572  | 0630900             | ATP-dependent RNA helicase HAS1                                  | 4          |             | 6           |
| 7    | 333558   | 0707200             | conserved protein ( <i>close to pfprt</i> )                      | 5          |             | 12          |
| 7    | 370246   | 0708000             | cytoskeleton associated protein ( <i>close to pfprt</i> )        | 4          |             | 1           |
| 7    | 375694   | 0708200             | conserved protein ( <i>close to pfprt</i> )                      | 9          |             | 14          |
| 7    | 409992   | 0709100             | Cg1 protein ( <i>close to pfprt</i> )                            | 11         |             | 38          |
| 7    | 417927   | 0709300             | Cg2 protein ( <i>close to pfprt</i> )                            | 7          |             | 46          |
| 7    | 467220   | 0710200             | conserved protein ( <i>close to pfprt</i> )                      | 5          | 2           |             |
| 8    | 488913   | 0809600             | peptidase family C50 ( <i>close to pfdhps</i> )                  | 9          | 3           | 29          |
| 8    | 542388   | 0810600             | ATP-dependent RNA helicase DBP1 ( <i>close to pfdhps</i> )       | 5          |             | 8           |
| 8    | 563088   | 0811200             | ER membrane protein complex subunit 1 ( <i>close to pfdhps</i> ) | 7          |             | 11          |
| 8    | 585494   | 0811600             | conserved protein ( <i>close to pfdhps</i> )                     | 4          |             |             |
| 8    | 598114   | 0811900             | RNA-binding protein ( <i>close to pfdhps</i> )                   | 6          |             | 4           |
| 12   | 750432   | 1219000             | formin 2                                                         | 4          |             | 1           |
| 12   | 943344   | 1223400             | phospholipid-transporting ATPase                                 | 6          |             | 3           |
| 12   | 954302   | 1223500             | conserved protein                                                | 8          |             | 11          |
| 14   | 2508460  | 1461800             | conserved protein                                                | 5          |             |             |
| 14   | 2536662  | 1462400             | conserved protein                                                | 4          |             | 39          |

Chr, Chromosome; iHS and Rsb counts defined as the number of SNPs in a gene that have an |iHS| or |Rsb| score with a p-value < 0.0001; *pfdhfr* (Chr. 4: 749001), *pfmdr1* (Chr. 5: 960020), *pfprt* (Chr. 7: 404770), *pfdhps* (Chr. 8: 549408)

S7 Table

**Plasmodium vivax loci identified by DeepSweep (DS; with >3 SNPs)**

| Chr. | Location | Gene ID<br>(PVP01_) | Gene Function                                                       | DS<br>Hits | iHS<br>hits | Rsb<br>hits |
|------|----------|---------------------|---------------------------------------------------------------------|------------|-------------|-------------|
| 1    | 904054   | 0119600             | Plasmodium exported protein                                         | 4          |             | 5           |
| 2    | 100527   | 0202000             | hypothetical protein                                                | 11         |             | 4           |
| 2    | 156981   | 0203000             | multidrug resistance-associated protein 1                           | 7          |             | 33          |
| 2    | 745122   | 0217200             | Plasmodium exported protein                                         | 5          |             |             |
| 3    | 620559   | 0313900             | exported serine/threonine protein kinase                            | 4          |             |             |
| 5    | 945918   | 0523400             | Plasmodium exported protein (PHIST)                                 | 4          |             | 6           |
| 5    | 1041740  | 0525700             | DNA helicase MCM9 ( <i>close to pvdhfr</i> )                        | 6          |             | 3           |
| 5    | 1047865  | 0525800             | histone acetyltransferase ( <i>close to pvdhfr</i> )                | 5          | 2           | 8           |
| 5    | 1064836  | 0526300             | conserved protein ( <i>close to pvdhfr</i> )                        | 9          | 2           | 4           |
| 5    | 1070542  | 0526400             | conserved protein ( <i>close to pvdhfr</i> )                        | 10         | 1           | 12          |
| 5    | 1093253  | 0526800             | conserved protein ( <i>close to pvdhfr</i> )                        | 19         | 4           | 12          |
| 6    | 1011569  | 0624300             | PIR protein                                                         | 4          |             |             |
| 7    | 64704    | 0701100             | reticulocyte binding protein 1b                                     | 10         |             | 8           |
| 7    | 500160   | 0709800             | cysteine repeat modular protein 1                                   | 11         |             | 0           |
| 7    | 1462407  | 0735200             | Plasmodium exported protein                                         | 5          |             | 6           |
| 9    | 972542   | 0922400             | peptidase M16                                                       | 4          |             |             |
| 9    | 1735229  | 0939900             | RNA-binding protein                                                 | 7          | 2           | 1           |
| 9    | 1752568  | 0940100             | AP2 domain transcription factor                                     | 5          |             |             |
| 9    | 2150596  | 0948800             | tryptophan-rich protein                                             | 10         |             | 5           |
| 10   | 490336   | 1011000             | zinc finger protein ( <i>close to pvmdr1</i> )                      | 11         |             | 1           |
| 10   | 1443984  | 1033900             | tryptophan-rich protein                                             | 7          |             |             |
| 10   | 1470845  | 1034400             | Plasmodium exported protein                                         | 9          |             |             |
| 11   | 61701    | 1101300             | Plasmodium exported protein                                         | 14         |             | 2           |
| 12   | 3026696  | 1271500             | lysophospholipase (PST-A)                                           | 8          |             |             |
| 13   | 814038   | 1317300             | conserved protein                                                   | 7          |             | 15          |
| 14   | 43063    | 1401100             | Plasmodium exported protein                                         | 5          |             |             |
| 14   | 798622   | 1418100             | AP2 domain transcription factor AP2-G3                              | 7          |             | 1           |
| 14   | 1227470  | 1428700             | conserved protein ( <i>close to pvdhps</i> )                        | 13         | 1           | 5           |
| 14   | 1232652  | 1428800             | histone-arginine methyltransferase CARM1 ( <i>close to pvdhps</i> ) | 4          | 1           |             |
| 14   | 1245928  | 1429000             | CCR4-associated factor 1 ( <i>close to pvdhps</i> )                 | 5          |             | 39          |
| 14   | 1300426  | 1430100             | ABC1 family ( <i>close to pvdhps</i> )                              | 4          |             |             |
| 14   | 1312634  | 1430400             | JmjC domain-containing protein ( <i>close to pvdhps</i> )           | 5          | 1           | 25          |
| 14   | 1320290  | 1430500             | conserved protein ( <i>close to pvdhps</i> )                        | 4          |             |             |
| 14   | 1336114  | 1430700             | peptidase family C50                                                | 21         |             |             |
| 14   | 1431856  | 1432900             | GPI ethanolamine phosphate transferase 3                            | 11         | 1           | 1           |

Chr, Chromosome; iHS and Rsb Counts defined as the number of SNPs in a gene that have an iHS or Rsb score with a p-value < 0.0001. *pvdhfr* (Chr. 5: 1078299), *pvmdr1* (Chr. 10: 480936, *pvdhps* (Chr. 14: 1271030)

**S8 Table*****Plasmodium falciparum* loci with the most iHS and Rsb hits**

| Chrom | Location | Gene ID<br>(PF3D7_) | Function                                      | iHS | Rsb | Deep Sweep |
|-------|----------|---------------------|-----------------------------------------------|-----|-----|------------|
| 7     | 452987   | 0710000             | conserved protein                             |     | 49  | 2          |
| 7     | 417927   | 0709300             | Cg2 protein                                   |     | 46  | 7          |
| 13    | 2116999  | 1352900             | Plasmodium exported protein                   | 1   | 41  |            |
| 14    | 2536662  | 1462400             | conserved protein                             |     | 39  | 4          |
| 6     | 1115827  | 0627800             | acetyl-CoA synthetase                         | 11  | 39  | 20         |
| 7     | 409992   | 0709100             | Cg1 protein                                   |     | 38  | 11         |
| 4     | 765952   | 0417400             | conserved protein                             |     | 37  | 8          |
| 5     | 1107081  | 0526600             | conserved protein                             |     | 37  |            |
| 6     | 1139634  | 0628100             | HECT-domain (ubiquitin-transferase)           | 1   | 30  | 18         |
| 8     | 488913   | 0809600             | peptidase family C50                          | 3   | 29  | 9          |
| 13    | 756296   | 1318300             | conserved protein                             |     | 25  |            |
| 7     | 1379445  | 0731800             | alpha/beta hydrolase                          |     | 25  |            |
| 14    | 3125133  | 1475900             | KELT protein                                  | 4   | 24  |            |
| 4     | 989562   | 0421700             | conserved protein                             | 20  | 23  |            |
| 8     | 608343   | 0812100             | proteasome activator complex subunit 4        |     | 20  | 1          |
| 11    | 1294496  | 1133400             | apical membrane antigen 1                     | 19  | 8   |            |
| 10    | 1395940  | 1035200             | S-antigen                                     | 18  | 8   |            |
| 14    | 2792063  | 1468100             | conserved protein                             |     | 17  | 3          |
| 10    | 217522   | 1004600             | conserved Plasmodium membrane protein         |     | 17  |            |
| 5     | 1288394  | 0531500             | unspecified product                           | 1   | 17  |            |
| 13    | 1011360  | 1324300             | conserved Plasmodium membrane protein         |     | 17  |            |
| 13    | 1421390  | 1335100             | merozoite surface protein 7                   | 2   | 16  |            |
| 13    | 1466337  | 1335900             | thrombospondin-related anonymous protein      | 16  | 12  |            |
| 7     | 340301   | 0707300             | rhopty-associated membrane antigen            |     | 16  | 1          |
| 5     | 1036670  | 0525000             | zinc finger protein                           |     | 16  |            |
| 12    | 785829   | 1219600             | aminophospholipid-transporting P-ATPase       | 15  |     |            |
| 9     | 285998   | 0905700             | autophagy-related protein 3                   |     | 15  |            |
| 7     | 929713   | 0721500             | conserved Plasmodium membrane protein         |     | 15  |            |
| 8     | 427868   | 0808500             | Plasmodium RNA of unknown function RUF6       | 2   | 15  |            |
| 8     | 549345   | 0810800             | HPPK-DHPS                                     |     | 15  | 4          |
| 8     | 1313279  | 0830800             | SURFIN 8.2                                    | 15  | 4   |            |
| 7     | 375693   | 0708200             | conserved protein                             |     | 14  | 9          |
| 5     | 482369   | 0511400             | conserved protein                             | 2   | 14  |            |
| 7     | 951490   | 0722300             | ubiquitin carboxyl-terminal hydrolase         |     | 13  | 1          |
| 8     | 919102   | 0820300             | conserved protein                             |     | 13  |            |
| 14    | 2527372  | 1462300             | GTP-binding protein                           |     | 13  | 2          |
| 7     | 333557   | 0707200             | conserved protein                             |     | 12  | 5          |
| 3     | 221968   | 0304600             | circumsporozoite (CS) protein                 | 1   | 12  |            |
| 2     | 618524   | 0215000             | acyl-CoA synthetase                           |     | 12  |            |
| 6     | 1265574  | 0630300             | DNA polymerase epsilon catalytic subunit A    | 1   | 11  | 1          |
| 13    | 108319   | 1301900             | Plasmodium exported protein                   | 1   | 11  |            |
| 3     | 653725   | 0316200             | conserved protein                             |     | 11  |            |
| 13    | 479886   | 1311100             | meiosis-specific nuclear structural protein 1 |     | 11  |            |
| 4     | 695218   | 0415800             | RING zinc finger protein                      |     | 11  |            |

|    |         |         |                                               |    |    |    |
|----|---------|---------|-----------------------------------------------|----|----|----|
| 6  | 852589  | 0620400 | merozoite surface protein 10                  |    | 11 |    |
| 7  | 382171  | 0708400 | heat shock protein 90                         |    | 11 |    |
| 6  | 590882  | 0614100 | conserved protein                             |    | 11 |    |
| 8  | 563087  | 0811200 | ER membrane protein complex subunit 1         |    | 11 | 7  |
| 12 | 2119088 | 1252100 | rhoptry neck protein 3                        |    | 11 |    |
| 12 | 954302  | 1223500 | conserved protein                             |    | 11 | 8  |
| 5  | 64553   | 0501200 | parasite-infected erythrocyte surface protein |    | 11 |    |
| 9  | 281899  | 0905600 | WD repeat-containing protein 66               |    | 11 |    |
| 10 | 1400721 | 1035300 | glutamate-rich protein GLURP                  | 10 | 1  |    |
| 5  | 1042329 | 0525100 | acyl-CoA synthetase                           |    | 10 |    |
| 8  | 846031  | 0818600 | BEM46-like protein                            | 2  | 10 |    |
| 5  | 1184595 | 0528900 | conserved protein                             |    | 10 |    |
| 6  | 665485  | 0615900 | protein phosphatase                           |    | 10 |    |
| 7  | 432013  | 0709600 | ribonucleases P/MRP protein subunit POP1      |    | 9  |    |
| 12 | 175563  | 1203300 | conserved protein                             |    | 9  |    |
| 6  | 571507  | 0613800 | AP2 domain transcription factor               |    | 9  |    |
| 7  | 883783  | 0720400 | apoptosis-inducing factor                     |    | 9  |    |
| 14 | 411037  | 1410300 | WD repeat-containing protein                  |    | 9  |    |
| 10 | 1573998 | 1039000 | serine/threonine protein kinase, FIKK family  |    | 9  |    |
| 11 | 138792  | 1103000 | conserved protein                             |    | 9  |    |
| 13 | 2341158 | 1359000 | conserved protein                             |    | 9  |    |
| 10 | 61898   | 1001000 | Plasmodium exported protein (hyp12)           | 2  | 9  |    |
| 13 | 2386189 | 1359700 | conserved protein                             |    | 9  |    |
| 12 | 712688  | 1218200 | conserved protein                             |    | 9  |    |
| 11 | 1376532 | 1135100 | protein phosphatase PPM8                      |    | 9  |    |
| 6  | 241806  | 0605800 | DNA repair protein RAD50                      |    | 9  |    |
| 13 | 100779  | 1301700 | CX3CL1-binding protein 2                      | 9  | 2  |    |
| 7  | 404151  | 0709000 | chloroquine resistance transporter            |    | 8  | 4  |
| 10 | 1420620 | 1035800 | probable protein                              |    | 8  |    |
| 14 | 1990103 | 1448500 | conserved protein                             |    | 8  |    |
| 5  | 921557  | 0522400 | conserved protein                             |    | 8  | 13 |
| 14 | 3121488 | 1475800 | conserved protein                             | 8  | 5  |    |
| 7  | 1089266 | 0726000 | 28S ribosomal RNA                             |    | 8  |    |
| 12 | 660272  | 1216600 | CelTOS                                        | 6  | 8  |    |
| 13 | 780617  | 1318900 | conserved protein                             |    | 8  |    |
| 10 | 497315  | 1012900 | autophagy-related protein 18                  |    | 8  |    |
| 6  | 1272955 | 0630400 | conserved protein                             |    | 8  |    |
| 8  | 542387  | 0810600 | ATP-dependent RNA helicase DBP1               |    | 8  | 5  |
| 7  | 505906  | 0711500 | regulator of chromosome condensation          | 7  | 8  | 3  |
| 7  | 729631  | 0716700 | conserved protein                             |    | 8  |    |
| 8  | 555489  | 0811000 | cullin-1                                      |    | 8  | 2  |
| 14 | 46645   | 1401200 | Plasmodium exported protein                   |    | 8  |    |
| 9  | 1437390 | 0936300 | ring-exported protein 3                       |    | 8  |    |
| 2  | 501713  | 0212400 | conserved Plasmodium membrane protein         |    | 7  |    |
| 7  | 932493  | 0721600 | 40S ribosomal protein S5                      |    | 7  |    |
| 9  | 1416021 | 0935800 | cytoadherence linked asexual protein 9        |    | 7  |    |
| 2  | 855072  | 0221200 | Plasmodium exported protein (hyp15)           |    | 7  |    |
| 14 | 1226553 | 1431200 | OST-HTH associated domain protein             |    | 7  |    |
| 2  | 109622  | 0202100 | liver stage associated protein 2              |    | 7  |    |

|    |         |         |                                                 |   |   |
|----|---------|---------|-------------------------------------------------|---|---|
| 8  | 331678  | 0806100 | conserved protein                               | 7 |   |
| 14 | 2183066 | 1453200 | conserved protein                               | 7 | 1 |
| 7  | 957542  | 0722500 | pre-mRNA-splicing factor CWC15                  | 7 |   |
| 14 | 304487  | 1408200 | AP2 domain transcription factor AP2-G2          | 7 |   |
| 9  | 110619  | 0902500 | serine/threonine protein kinase, FIKK family    | 6 |   |
| 9  | 747006  | 0918100 | cytochrome b5-like heme/steroid binding protein | 6 |   |

---

iHS and Rsb Counts defined as the number of SNPs in a gene that have an iHS or Rsb score with a p-value < 0.0001



S9 Table

*Plasmodium vivax* loci with the most iHS and Rsb hits

| Chr. | Location | Gene ID<br>(PVP01_) | Function                                    | iHS<br>hits | Rsb<br>hits | Deep<br>Sweep |
|------|----------|---------------------|---------------------------------------------|-------------|-------------|---------------|
| 2    | 148495   | 0202900             | 18S ribosomal RNA                           | 2           | 62          |               |
| 10   | 189242   | 1003700             | phosphoenolpyruvate/phosphate translocator  | 2           | 45          |               |
| 14   | 1245928  | 1429000             | CCR4-associated factor 1                    |             | 39          | 5             |
| 2    | 156981   | 0203000             | multidrug resistance-associated protein 1   |             | 33          | 7             |
| 14   | 1284723  | 1429800             | protein phosphatase PPM7                    |             | 29          |               |
| 10   | 146870   | 1002700             | conserved protein                           | 2           | 28          | 3             |
| 10   | 153038   | 1002800             | SURF1 domain-containing protein             |             | 26          |               |
| 14   | 1312633  | 1430400             | JmjC domain-containing protein              | 1           | 25          | 5             |
| 10   | 184519   | 1003600             | conserved protein                           |             | 24          |               |
| 1    | 883223   | 0119200             | Plasmodium exported protein (PHISTc)        |             | 21          |               |
| 10   | 318571   | 1007200             | conserved protein                           | 5           | 18          |               |
| 10   | 205509   | 1004100             | conserved protein                           |             | 18          |               |
| 3    | 123931   | 0302600             | conserved protein                           | 13          | 16          |               |
| 10   | 1376089  | 1032000             | 50S ribosomal protein L28, apicoplast       | 6           | 16          |               |
| 13   | 814038   | 1317300             | conserved protein                           |             | 15          | 7             |
| 14   | 2257490  | 1451700             | asparagine and aspartate rich protein 1     |             | 13          |               |
| 14   | 1263931  | 1429300             | cullin-1                                    |             | 13          | 2             |
| 5    | 210653   | 0504700             | 18S ribosomal RNA                           |             | 12          |               |
|      |          |                     | major facilitator superfamily-related       |             |             |               |
| 11   | 1483167  | 1134800             | transporter                                 |             | 12          |               |
| 14   | 823643   | 1418900             | conserved protein                           |             | 12          |               |
| 10   | 1324328  | 1030700             | hypothetical protein                        |             | 12          | 2             |
| 12   | 788337   | 1219200             | hypothetical protein                        | 8           | 12          | 2             |
|      |          |                     | tRNA (adenine(58)-N(1))-methyltransferase   |             |             |               |
| 7    | 551240   | 0711200             | non- catalytic subunit TRM6                 | 1           | 12          |               |
| 14   | 1255147  | 1429100             | ER membrane protein complex subunit 1       |             | 12          | 3             |
| 5    | 1070542  | 0526400             | conserved protein                           | 1           | 12          | 10            |
| 2    | 105832   | 0202100             | Plasmodium exported protein                 | 2           | 12          |               |
| 14   | 1267716  | 1429400             | conserved protein                           |             | 12          | 1             |
| 2    | 175717   | 0203400             | eukaryotic translation initiation factor 4E | 2           | 12          | 2             |
| 5    | 1093253  | 0526800             | conserved protein                           | 4           | 12          | 19            |
| 8    | 108099   | 0802000             | 5.8S ribosomal RNA                          |             | 11          |               |
| 9    | 328701   | 0905600             | RNA polymerase subunit                      | 1           | 11          |               |
| 10   | 168725   | 1003200             | conserved protein                           |             | 11          |               |
| 10   | 1387953  | 1032500             | conserved protein                           | 1           | 11          |               |
| 13   | 2014020  | 1346200             | ribosomal protein S27a                      | 2           | 11          |               |
| 4    | 212211   | 0404700             | Plasmodium exported protein                 |             | 10          |               |
| 13   | 2017523  | 1346400             | zinc finger protein                         | 9           | 10          |               |
| 4    | 584464   | 0414300             | conserved protein                           |             | 10          |               |
| 5    | 1258182  | 0529800             | AP2 domain transcription factor             |             | 10          |               |
| 14   | 2696171  | 1462600             | conserved protein                           | 1           | 10          |               |
| 7    | 1217570  | 0728900             | merozoite surface protein 1                 | 10          | 5           | 1             |
| 14   | 2207640  | 1450700             | CG2-related protein                         |             | 10          |               |
| 14   | 1278613  | 1429700             | ATP-dependent RNA helicase DBP1             |             | 10          |               |

|    |         |         |                                              |   |    |    |
|----|---------|---------|----------------------------------------------|---|----|----|
| 10 | 159076  | 1002900 | formin 1                                     |   | 10 |    |
| 14 | 2035601 | 1447000 | WD repeat-containing protein                 | 1 | 10 |    |
| 12 | 2248858 | 1255000 | rhopty neck protein 2                        |   | 9  | 2  |
|    |         |         | glutamine--fructose-6-phosphate              |   |    |    |
| 6  | 456433  | 0610300 | aminotransferase [isomerizing]               |   | 9  |    |
| 11 | 1742196 | 1141100 | conserved protein                            |   | 9  |    |
| 5  | 1073823 | 0526500 | mRNA-binding protein PUF2                    |   | 9  | 2  |
| 11 | 1675817 | 1139500 | cardiolipin synthetase                       |   | 9  |    |
| 10 | 521068  | 1011500 | conserved protein                            |   | 9  | 3  |
| 12 | 2987482 | 1270700 | conserved protein                            | 1 | 9  |    |
| 4  | 680716  | 0416700 | conserved protein                            |   | 9  |    |
| 4  | 747321  | 0418000 | serine-repeat antigen (SERA)                 |   | 9  |    |
| 5  | 190906  | 0504400 | sporozoite invasion-associated protein 2     |   | 9  |    |
| 11 | 698237  | 1116200 | NLI interacting factor-like phosphatase      |   | 9  |    |
| 5  | 855549  | 0520900 | conserved protein                            | 1 | 9  |    |
| 14 | 2710458 | 1462900 | ankyrin-repeat protein                       |   | 8  |    |
| 11 | 1423420 | 1133300 | conserved oligomeric Golgi complex subunit 4 |   | 8  |    |
|    |         |         | bifunctional dihydrofolate reductase-        |   |    |    |
| 5  | 1077709 | 0526600 | thymidylate synthase                         |   | 8  | 5  |
| 6  | 579569  | 0613600 | partial CSTF domain-containing protein       |   | 8  |    |
| 8  | 1611934 | 0838000 | Plasmodium exported protein                  |   | 8  |    |
| 7  | 64704   | 0701100 | reticulocyte binding protein 1b              |   | 8  | 10 |
| 7  | 692112  | 0715200 | conserved protein                            |   | 8  |    |
| 13 | 567027  | 1312400 | conserved protein                            |   | 8  |    |
| 5  | 1368574 | 0532400 | cysteine-rich protective antigen             | 8 | 2  |    |
| 12 | 324002  | 1208000 | 6-cysteine protein                           | 1 | 8  |    |
| 12 | 153028  | 1203700 | conserved protein                            |   | 8  |    |
| 5  | 1047865 | 0525800 | histone acetyltransferase                    | 2 | 8  | 5  |
| 2  | 391828  | 0209400 | conserved protein                            |   | 8  |    |
| 3  | 496884  | 0311200 | conserved protein                            |   | 7  |    |
| 1  | 772847  | 0117000 | filament assembling protein                  |   | 7  |    |
| 14 | 1260196 | 1429200 | mitochondrial carrier protein                |   | 7  | 1  |
|    |         |         | hydroxymethyldihydropterin                   |   |    |    |
| 14 | 1270993 | 1429500 | pyrophosphokinase-dihydropteroate synthase   |   | 7  | 4  |
| 14 | 2701487 | 1462700 | kinesin                                      |   | 7  |    |
| 9  | 274077  | 0904400 | actin-like protein                           | 2 | 7  |    |
| 8  | 1504916 | 0835500 | conserved protein                            |   | 7  |    |
| 11 | 1247714 | 1128700 | tRNA Alanine                                 |   | 7  |    |
| 6  | 668362  | 0616000 | ookinete surface protein P28                 | 1 | 7  |    |
| 10 | 449901  | 1010100 | divalent metal transporter                   |   | 7  | 1  |
| 10 | 1327562 | 1030800 | hypothetical protein                         |   | 7  | 1  |
| 10 | 1306926 | 1030300 | myosin B                                     |   | 7  |    |
| 10 | 374884  | 1008500 | conserved protein                            |   | 7  |    |
| 14 | 815587  | 1418600 | conserved protein                            |   | 7  |    |
| 10 | 1407703 | 1033100 | conserved protein                            | 7 | 0  |    |
| 14 | 817482  | 1418700 | 40S ribosomal protein S19                    |   | 7  |    |
| 10 | 1303077 | 1030200 | 60S ribosomal protein L31                    |   | 7  |    |
| 6  | 283136  | 0606900 | conserved protein                            |   | 6  |    |
| 11 | 141431  | 1103200 | DNA repair endonuclease XPF                  |   | 6  |    |

|    |         |         |                                          |   |   |   |
|----|---------|---------|------------------------------------------|---|---|---|
| 7  | 1140161 | 0726700 | conserved protein                        |   | 6 |   |
| 11 | 678373  | 1115800 | conserved protein                        |   | 6 |   |
| 12 | 768965  | 1218700 | thrombospondin-related anonymous protein |   | 6 |   |
| 7  | 76205   | 0701200 | reticulocyte binding protein 1a          | 5 | 6 |   |
| 11 | 1629987 | 1138400 | transketolase                            |   | 6 |   |
| 13 | 1291399 | 1330800 | liver specific protein 1                 |   | 6 | 1 |
| 7  | 1462407 | 0735200 | Plasmodium exported protein              |   | 6 | 5 |
| 6  | 427598  | 0609500 | ATP synthase-associated protein          |   | 6 |   |
| 13 | 2015443 | 1346300 | small nucleolar RNA snoR22               |   | 6 |   |
| 5  | 722009  | 0517200 | zinc finger protein                      |   | 6 |   |
| 13 | 1139543 | 1326200 | actin-related protein                    | 2 | 6 |   |
| 5  | 945918  | 0523400 | Plasmodium exported protein (PHIST)      |   | 6 | 4 |

---

iHS and Rsb Counts defined as the number of SNPs in a gene that have an iHS or Rsb score with a p-value < 0.0001

**S1 Figure**  
**The creation of haplo-images**

**Panel 1)**

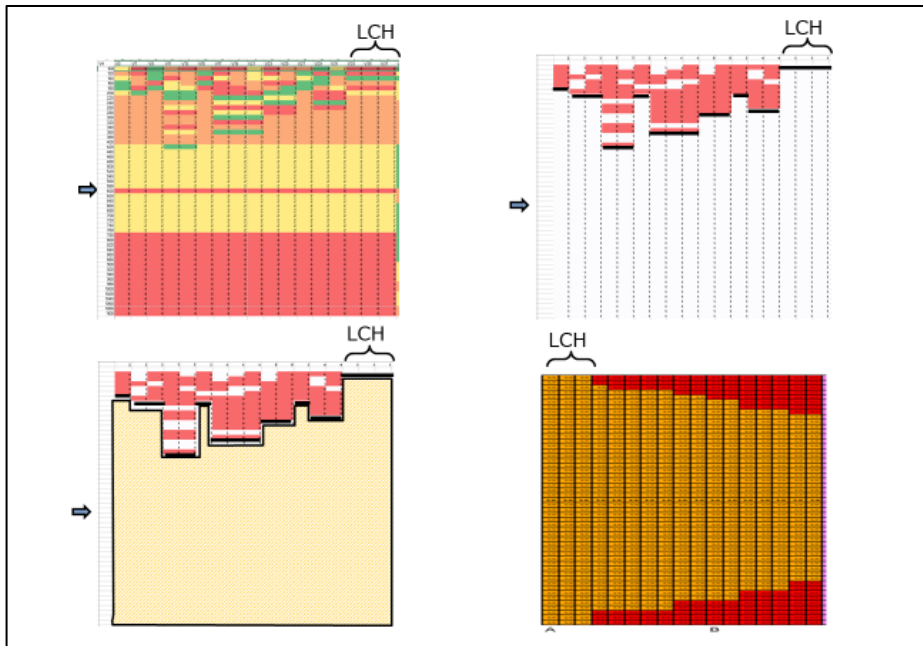

**Panel 2)**

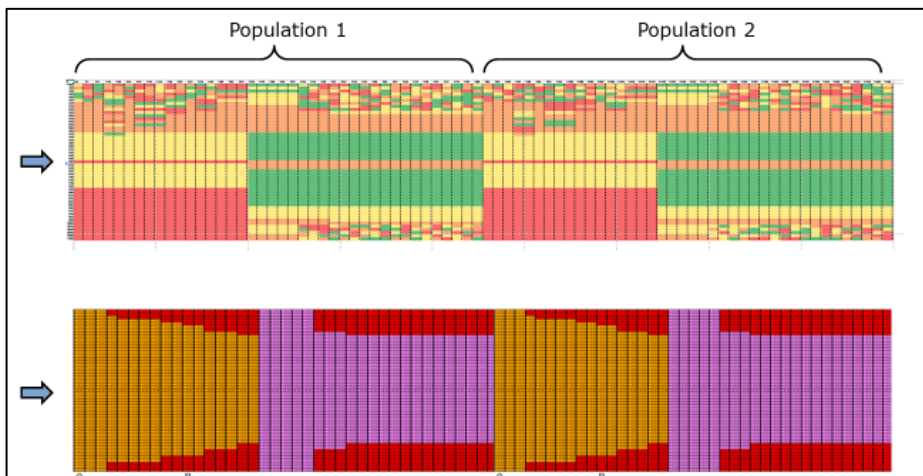

**Panel 1 Top-left:** The image shows a small hypothetical genomic dataset of 51 SNPs (rows) and 17 samples (columns) with nucleotides re-coded as 1,2,3 and 4. All samples come from one population and have the same allele in the mid-position (row 25, highlighted with arrow). The creation of a haplo-image for this 25th SNP would start with determining the longest common haplotype (LCH). In this example, the last three columns share the LCH. **Panel 1 Top-right:** The differences between these three samples that make up the LCH and the other samples are shown in red. **Panel 1 Bottom-left:** The overlaps between the LCH samples and the other samples is shown in yellow. **Panel 1 Bottom-right:** A re-ordering based on shared overlap gives a haplo-image (for one population and one allele). **Panel 2 Top:** A hypothetical dataset with two alleles and two populations. **Panel 2 Bottom:** The resulting haplo-image. It should be noted that the actual process involves haplo-images each comprised of 1,401 SNPs. These SNPs were however not adjacent to one another but were chosen to be a specific distance apart. This distance was 100 basepoints for *P. falciparum* and 50 basepoints for *P. vivax*. The resulting genomic haplotype matrices have a size equivalent to the range of SNPs (e.g. 1,401 SNPs) and the number of samples (e.g. 1,100 samples). However, to improve the computational speed of the *DeepSweep* algorithm, these genomic matrices were further shrunk to a size of a height of 40 pixels by a width of 200 pixels, using “nearest” interpolation in the Scipy image package (59).

S2 Figure

Workflow

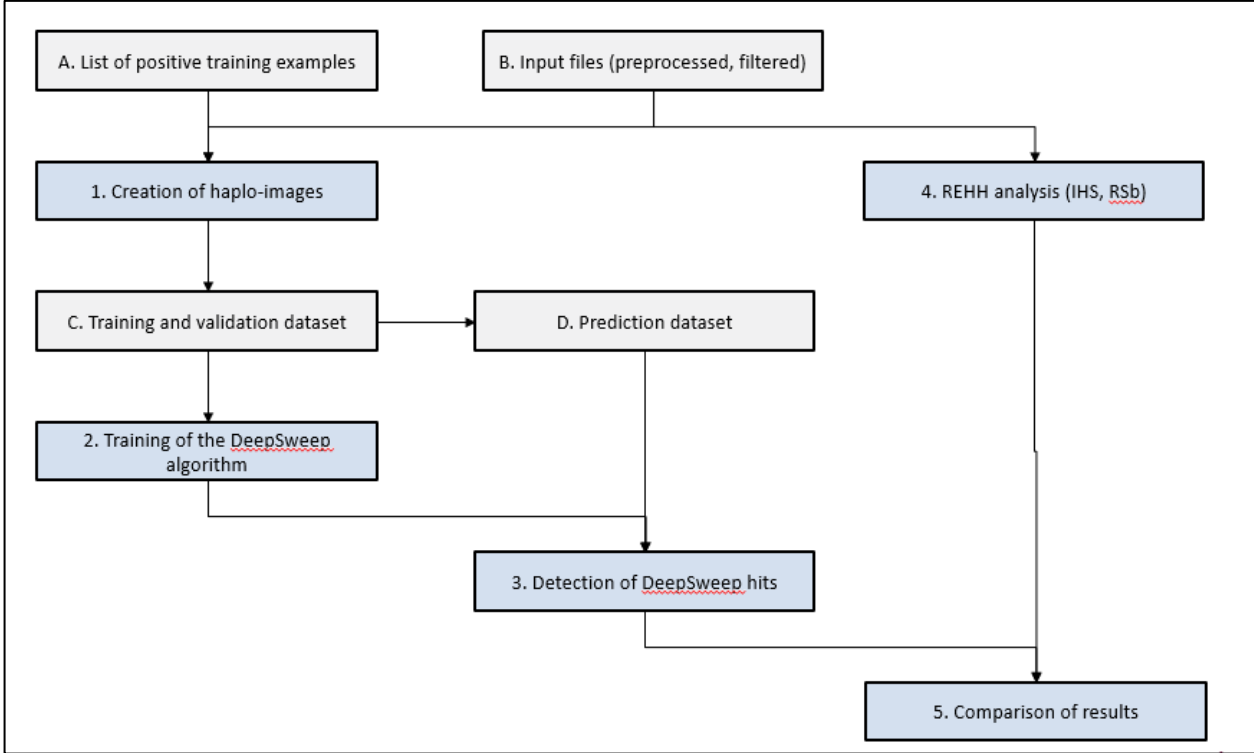

Legend: Grey boxes are datasets, blue boxes are activity steps. Step 1 (creation of haplo-images) is further expanded upon in S1 Figure.

### S3 Figure

#### Exemplar images of simulated isolates undergoing different types of sweeps or neutral evolution

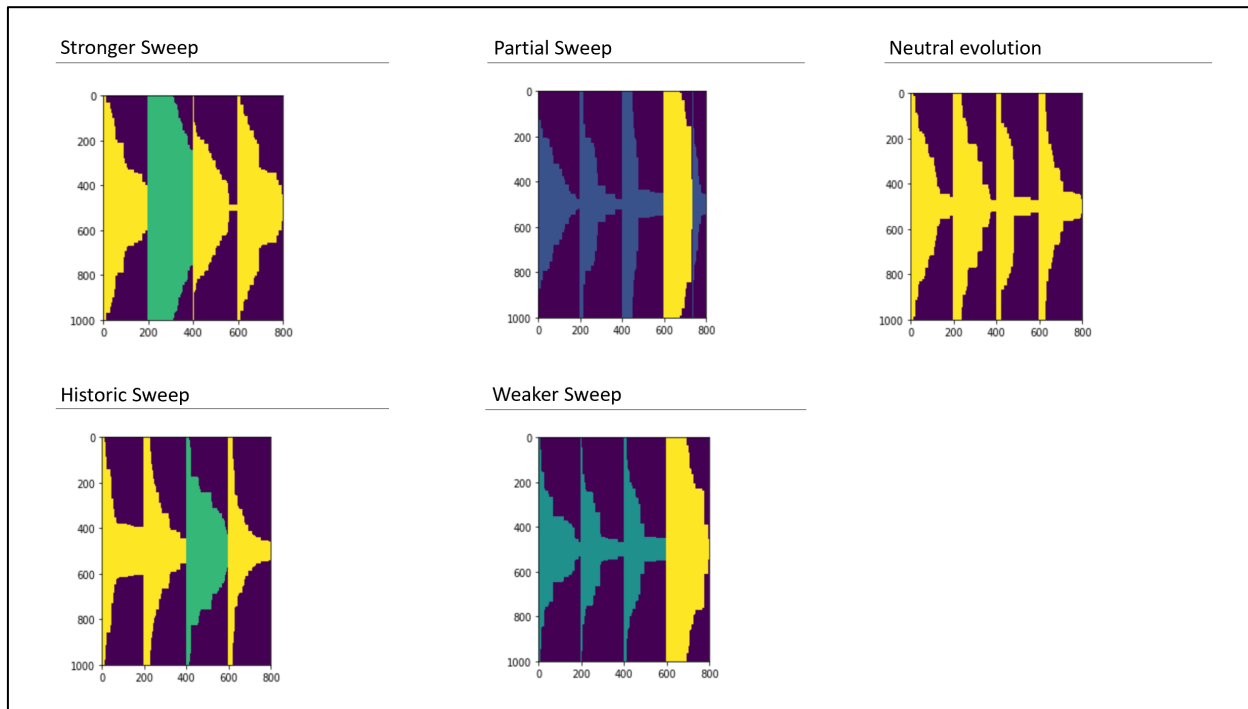

Each individual diagram is a haplo-image of a specific SNP for population of parasites, with the genomic information simulated following the settings as described in **S1 Table**. The haplo-images are created following the explanation in **S1 Figure**, with genomes of the individual parasites ordered on the horizontal axis and the overlap in haplotype for the SNP in focus shown on the vertical axis. The colour coding links to overlap in specific nucleotides (yellow, green, dark blue, light blue) with the purple background indicating no overlap. The sweeps in these illustrative examples are different nucleotides/alleles than the ancestral nucleotide/allele. Weaker sweep refers to simulation with relatively low selection coefficient; historic refers to a simulated sweep that occurred further in the past; partial refers to a partial sweep that is not fully fixed; stronger refers to a sweep with a relatively high selection coefficient.

## S4 Figure

### Model performance on simulated datasets

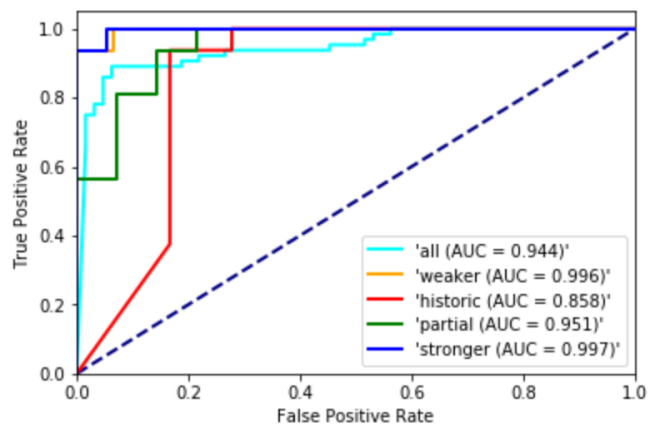

“weaker” refers to the simulation with a low selection coefficient; “historic” refers to a simulated sweep that occurred further in the past; “partial” refers to a partial sweep that is not fully fixed; “stronger” refers to a sweep with a high selection coefficient; “all” refers to all sweeps combined; AUC Area under the ROC Curve.

## S5 Figure

### Distribution of the minor allele frequencies across the SNPs

#### a) *P. falciparum* (N=750k SNPs)

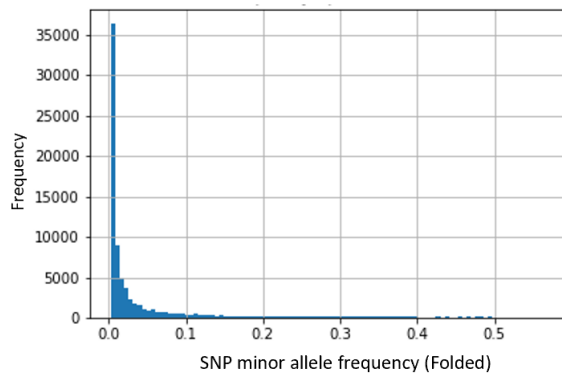

#### b) *P. vivax* (N=588k SNPs)

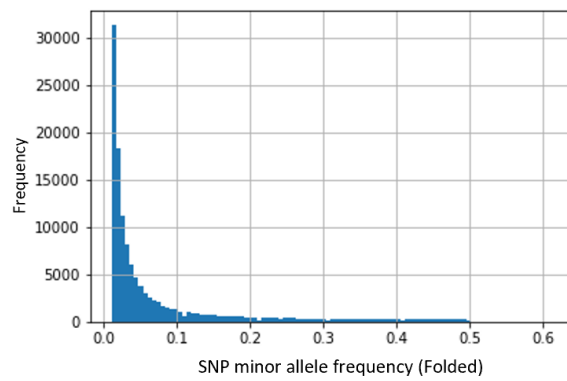



S6 Figure

Model performance for *Plasmodium falciparum* and *P. vivax* on training and validation datasets

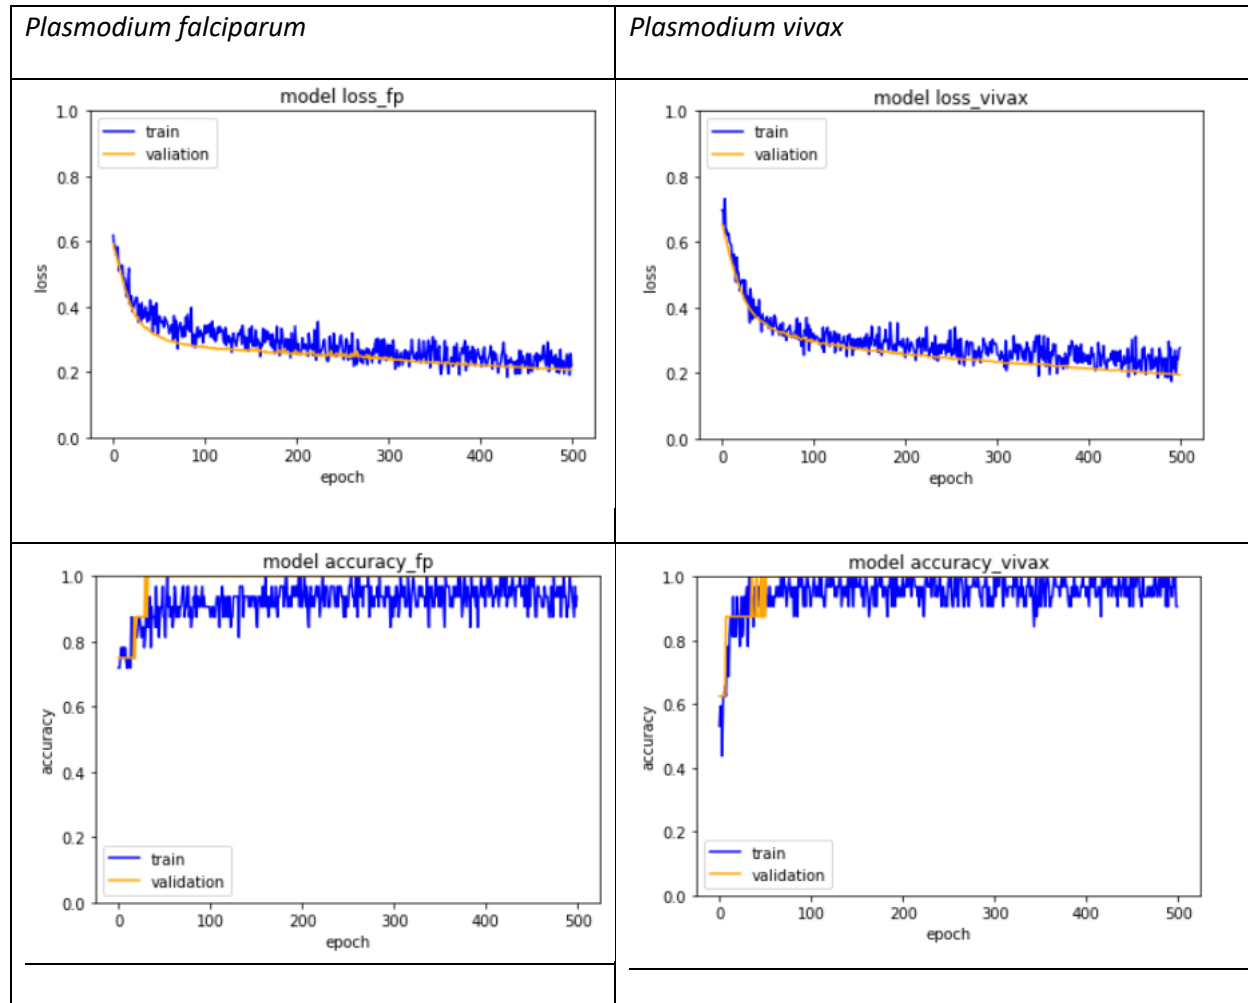

The left panel shows the performance of the model in the *P. falciparum* parasite data, and the right panel shows the performance of the model in the *P. vivax* parasite data. The top panel shows model loss (measured as binomial loss) and the bottom panel shows model accuracy (measured as correct classification). The blue lines show the statistics for the training datasets and the orange lines show the statistics for the validation datasets. A negative slope in the top panel indicates a decrease in loss as the model trains over more epochs. An increasing slope in the bottom panel indicates an increase in accuracy and a reduction in misclassification as the model trains over more epochs.

S7 Figure

Relationship between  $-\log_{10}$  p-value of Rsb hits and number of *DeepSweep* hits

a) *P. falciparum*

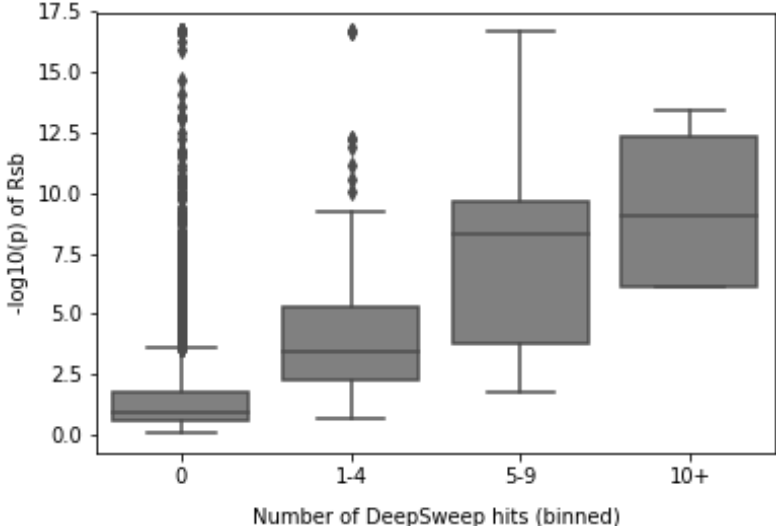

b) *P. vivax*

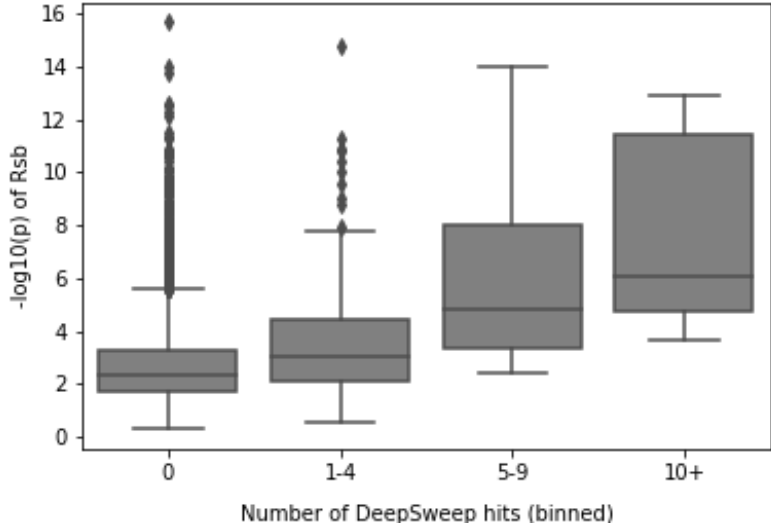

Supplement: MOESM1 [file 19258766]
